# Supplementary material for: Provenance Variation in Seed and Fruit Pod Traits of Multipurpose Wonder Forest Tree Siris (Albizzia lebbek) in Northern India and Relationships with Bioclimatic Factors
Source: Preprints.org preprint supplement (doi:10.20944/preprints202403.0146.v1), 2024-03-04
Supplement: Supplementary file 1 [file supplementary]

**Supplementary Material**

**Provenance Variation in Seed and Fruit Pod Traits of Multipurpose Wonder Forest Tree Siris (*Albizzia lebbek*) in Northern India and Relationships with Bioclimatic Factors**

Om P. Rajora1, Abdul Bari Muneera Parveen2, Modhumita Dasgupta2

1 Faculty of Forestry and Environmental Management, University of New Brunswick,

P.O. Box 44000, 28 Dineen Drive, Fredericton, NB E3B 5A3, Canada

2 ICFRE-Institute of Forest Genetics and Tree Breeding, R.S. Puram, Coimbatore 641002, India

* Author for Correspondence

Om P. Rajora

[Om.Rajora@unb.ca](mailto:Om.Rajora@unb.ca)

**Table S1:** Eigen values and percentage of variance explained by principal components (PC)

|  | **Eigenvalues** | **Variance (%)** | **Accumulated (%)** |
| --- | --- | --- | --- |
| **PC1** | 13.8733 | 37.4955 | 37.4955 |
| **PC2** | 7.3911 | 19.9761 | 57.4716 |
| **PC3** | 5.2872 | 14.2899 | 71.7614 |
| **PC4** | 3.2474 | 8.7767 | 80.5381 |
| **PC5** | 2.7636 | 7.4692 | 88.0074 |
| **PC6** | 1.3744 | 3.7145 | 91.7219 |
| **PC7** | 1.3149 | 3.5537 | 95.2756 |
| **PC8** | 0.7913 | 2.1386 | 97.4142 |
| **PC9** | 0.5185 | 1.4012 | 98.8154 |
| **PC10** | 0.2812 | 0.7601 | 99.5755 |
| **PC11** | 0.1571 | 0.4245 | 100 |

**Table S2:** Pearson’s correlation coefficients of the first two principal components with the climatic factors for siris seed and pod traits.

| **Climatic factor, geographic coordinate for siris seed and pod trait** | **Principal Component 1** | ***p* Value** |
| --- | --- | --- |
| Mean temperature of coldest quarter | 0.9848624 | 6.10E-09 |
| Annual mean temperature | 0.9786463 | 3.37E-08 |
| Min temperature of coldest month | 0.9606437 | 6.96E-07 |
| Max temperature of warmest month | 0.9508705 | 2.08E-06 |
| Mean diurnal range | 0.9507343 | 2.10E-06 |
| Mean temperature of warmest quarter | 0.9471158 | 2.98E-06 |
| Precipitation seasonality | 0.9228094 | 1.89E-05 |
| Mean temperature of wettest quarter | 0.9178291 | 2.57E-05 |
| Temperature annual range | 0.7919447 | 2.14E-03 |
| Isothermality | 0.7250673 | 7.63E-03 |
| Mean temperature of driest quarter | 0.6412563 | 2.46E-02 |
| Pod width | 0.594092 | 4.17E-02 |
| Insect infected seeds | 0.5781671 | 4.89E-02 |
| Precipitation of driest quarter | -0.9014516 | 6.19E-05 |
| Precipitation of coldest quarter | -0.915105 | 3.01E-05 |
| Precipitation of driest month | -0.9520584 | 1.84E-06 |
|  | **Principal Component 2** | ***p* Value** |
| Precipitation of wettest month | 0.8216060 | 0.001045826 |
| Precipitation of wettest quarter | 0.7909030 | 0.002189393 |
| Precipitation of warmest quarter | 0.7700954 | 0.003387710 |
| Number of seeds per pod | 0.7649147 | 0.003751334 |
| Annual precipitation | 0.7418692 | 0.005739503 |
| Rainfall (cm) | 0.7132875 | 0.009201672 |
| Latitude | 0.6179613 | 0.032234634 |
| Seed width/ Seed length | -0.6423891 | 0.024285345 |
| Seed width | -0.7742893 | 0.003113499 |
